# Supplementary material for: Virulence Profile, Antibiotic Resistance, and Phylogenetic Relationships among Escherichia coli Strains Isolated from the Feces and Urine of Hospitalized Patients
Source: MDPI journal article supplement (doi:10.3390/pathogens11121528), 2022-12-13
Supplement: s1 [file s1]

Supplementary Material

## Virulence Profile, Antibiotic Resistance, and Phylogenetic Relationships Among *Escherichia coli* Strains Isolated from the Feces and Urine of Hospitalized Patients

José F. Santos-Neto <sup>1</sup>, Ana C. M. Santos <sup>1,\*</sup>, Júlia A. S. Nascimento <sup>1</sup>, Liana O. Trovão <sup>1</sup>,  
Fernanda F. Santos <sup>2</sup>, Tiago B. Valiatti <sup>2</sup>, Ana C. Gales <sup>2</sup>, Ana L. V. R. Marques <sup>3</sup>, Isabel C. Pinaffi <sup>4</sup>,  
Mônica A. M. Vieira <sup>1</sup>, Rosa M. Silva <sup>5</sup>, Ivan N. Falsetti <sup>3,4</sup>, Tânia A. T. Gomes <sup>1,\*</sup>

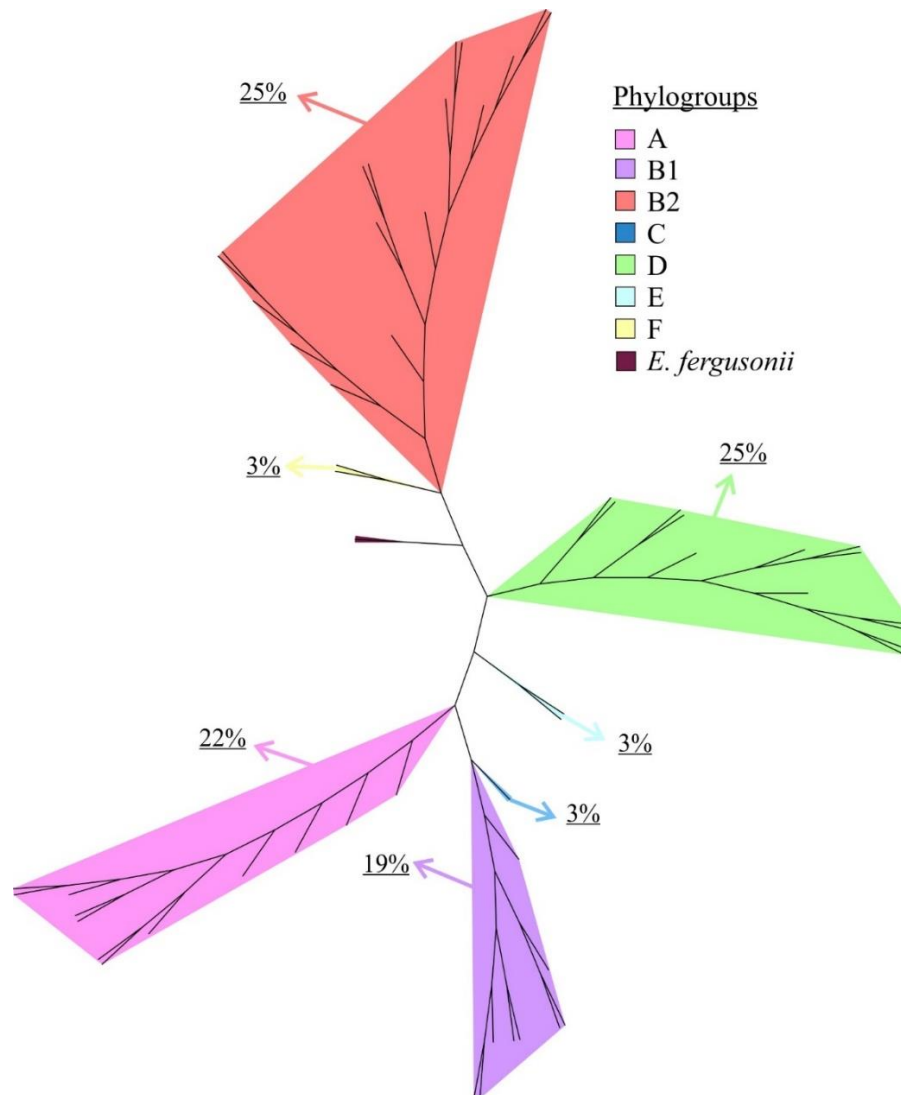

**Figure S1**—Phylogenetic relationship of *Escherichia coli* strains isolated from the gut. Unroot phylogenetic tree highlighting the phylogenetic origin of the 44 sequenced strains isolated from inpatients' guts. The percentages represent the frequency of each phylogroup in the sample.

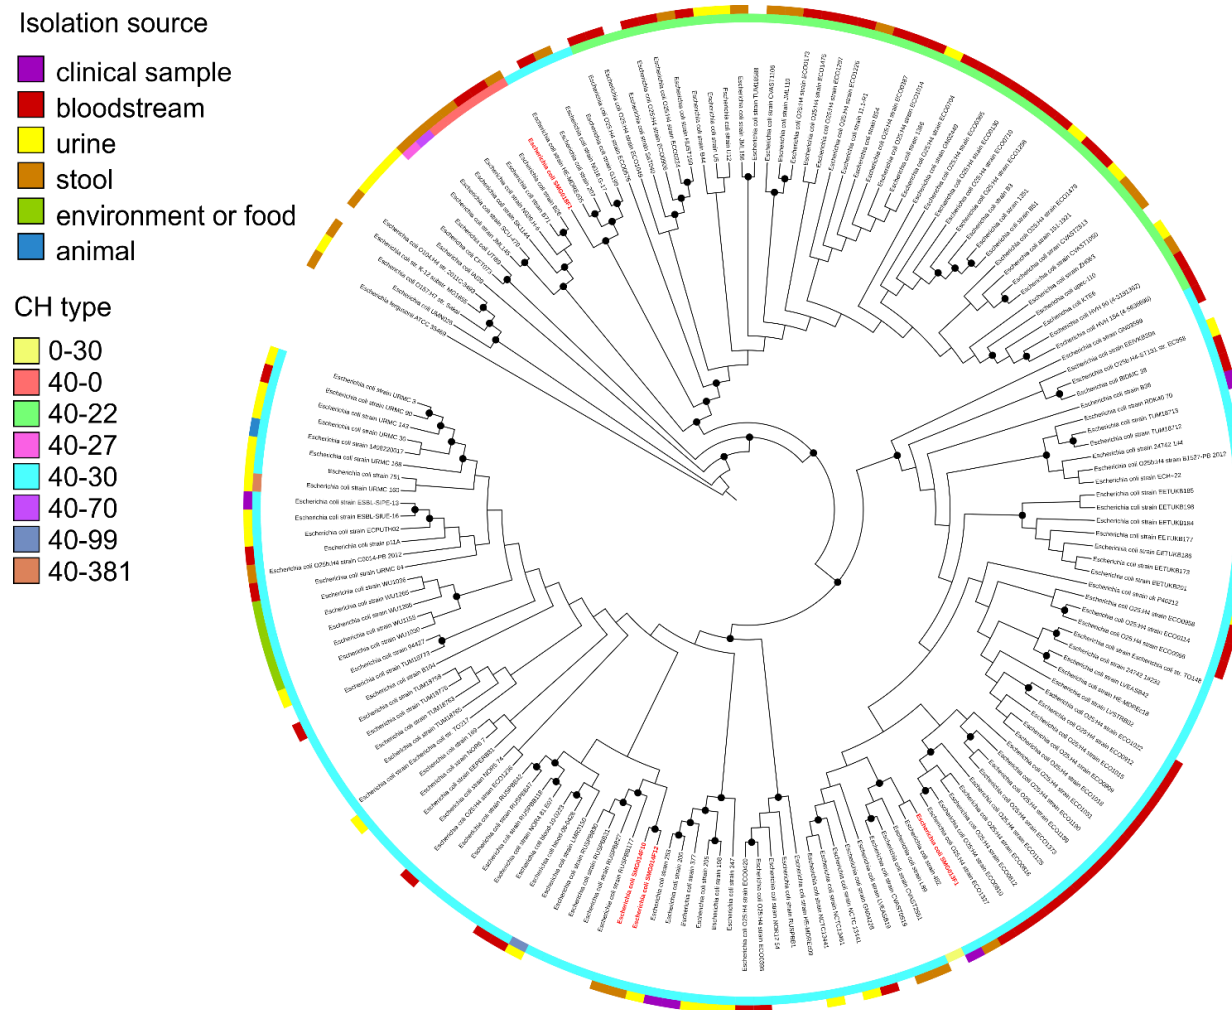

**Figure S2.** Phylogenetic tree focusing on strains belonging to ST131. The tree was built with 154 public *E. coli* genomes belonging to ST131, plus eight control strains (*Escherichia fergusonii* ATCC 35469, *E. coli* CFT073, *E. coli* O157:H7 str. Sakai, *E. coli* UTI89, *E. coli* str. K-12 substr. MG1655, *E. coli* UMN026, *E. coli* O104:H4 str. 2011C-3493, and *E. coli* IAI39). The strains in bold and red are those identified in the present study. The bootstrap values above 80 are indicated with a black circle on the leaf. The strain *E. fergusonii* ATCC 35469 was the root of the tree. The inner ring represents the CH type, and the outer ring is the isolation source.

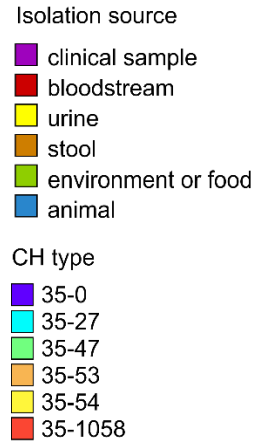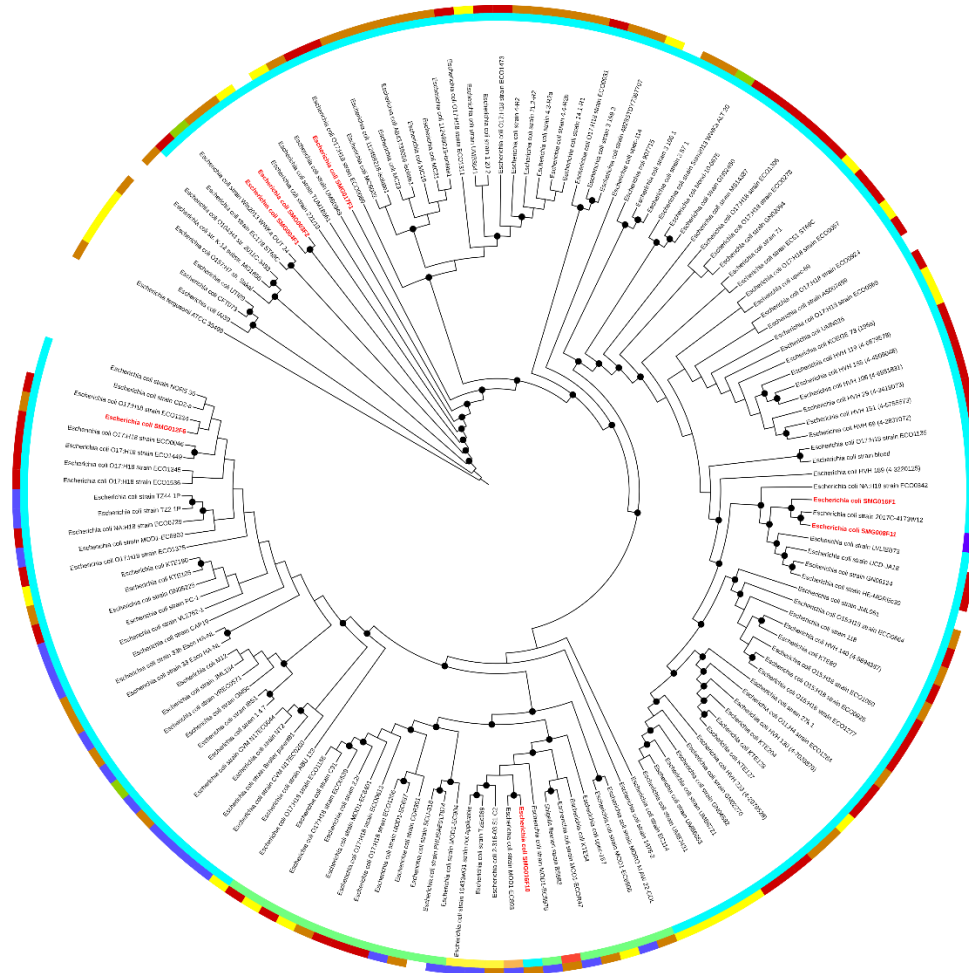

**Figure S3.** Phylogenetic tree focusing on strains belonging to ST69. The tree was built with 136 public *E. coli* genomes belonging to ST69, plus eight control strains (*Escherichia fergusonii* ATCC 35469, *E. coli* CFT073, *E. coli* O157:H7 str. Sakai, *E. coli* UTI89, *E. coli* str. K-12 substr. MG1655, *E. coli* UMN026, *E. coli* O104:H4 str. 2011C-3493, and *E. coli* IAI39). The strains in bold and red are those identified in the present study. The bootstrap values above 80 are indicated with a black circle on the leaf. The strain *E. fergusonii* ATCC 35469 was the root of the tree. The inner ring represents the CH type, and the outer ring is the isolation source.

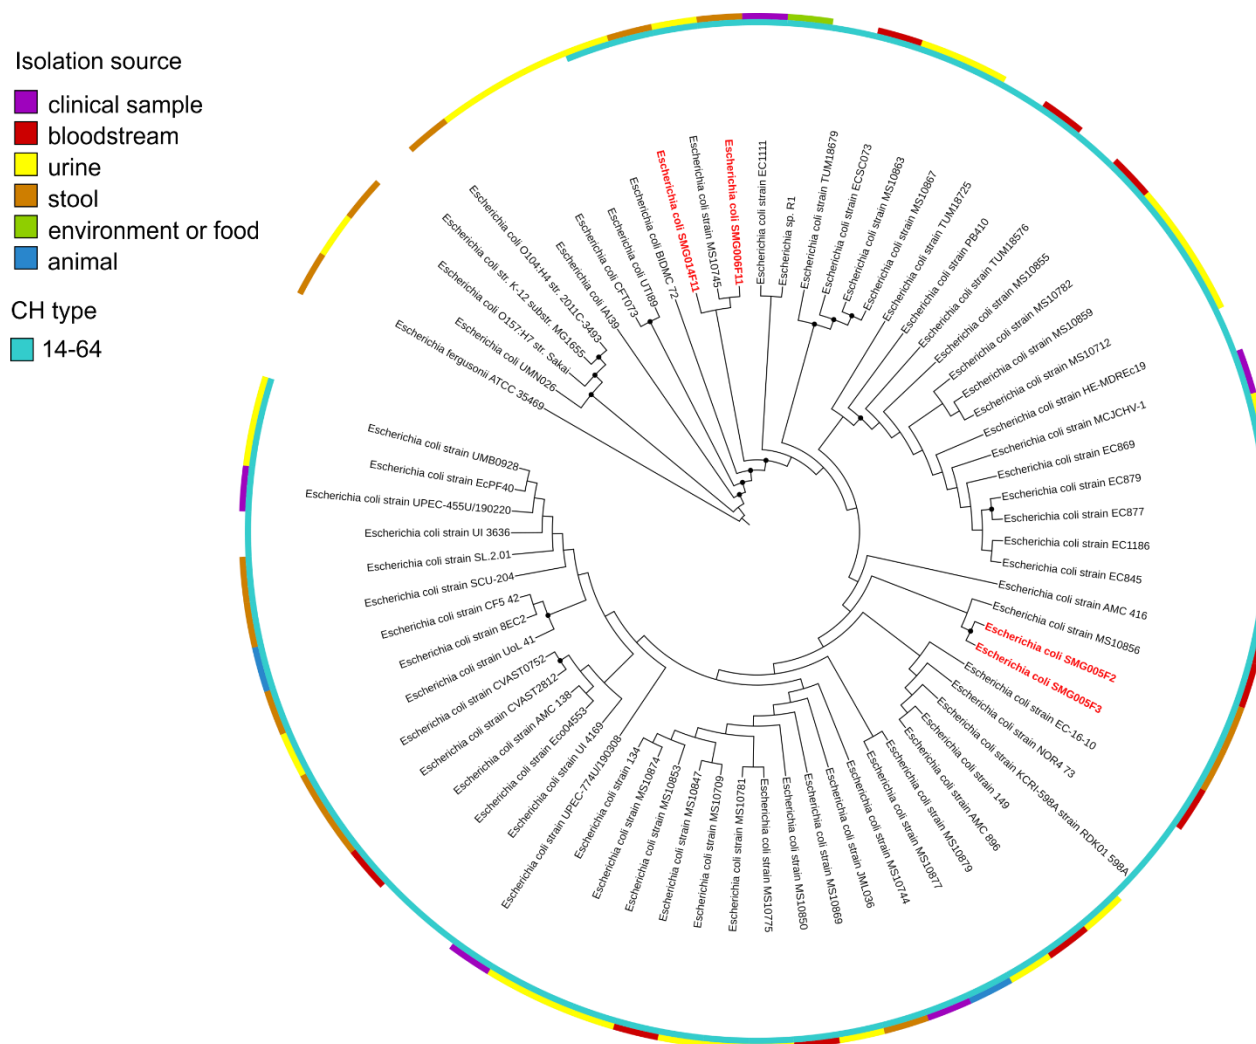

**Figure S4.** Phylogenetic tree focusing on strains belonging to ST1193. The tree was built with 58 public *E. coli* genomes belonging to ST1193, plus eight control strains (*Escherichia fergusonii* ATCC 35469, *E. coli* CFT073, *E. coli* O157:H7 str. Sakai, *E. coli* UTI89, *E. coli* str. K-12 substr. MG1655, *E. coli* UMN026, *E. coli* O104:H4 str. 2011C-3493, and *E. coli* IAI39). The strains in bold and red are those identified in the present study. The bootstrap values above 80 are indicated with a black circle on the leaf. The strain *E. fergusonii* ATCC 35469 was the root of the tree. The inner ring represents the CH type, and the outer ring is the isolation source.

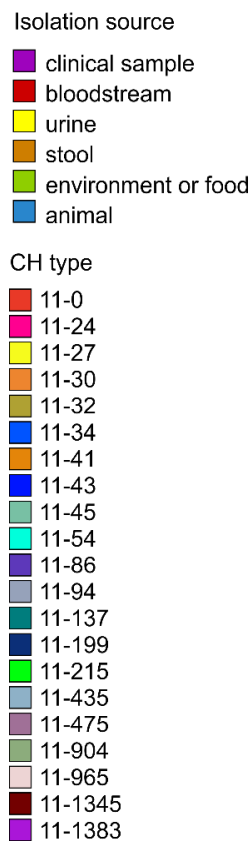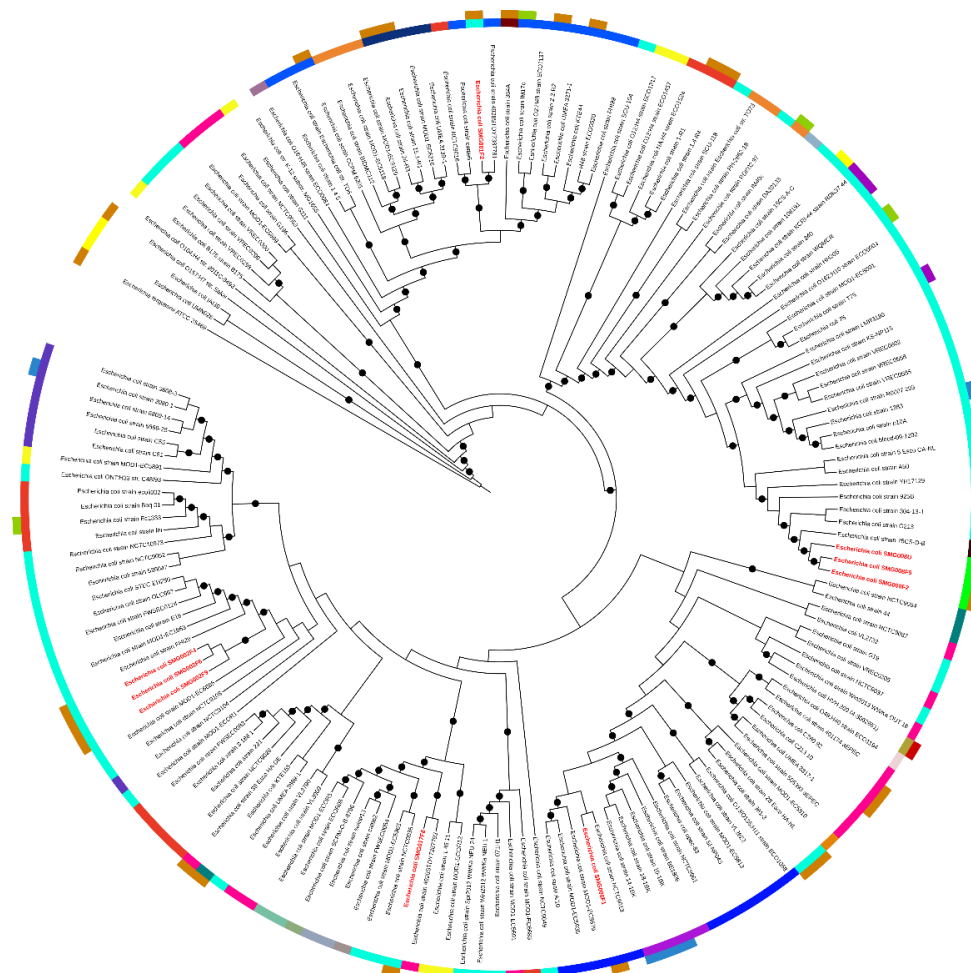

**Figure S5.** Phylogenetic tree focusing on strains belonging to ST10cc. The tree was built with 154 public *E. coli* genomes belonging to ST10, plus six control strains (*Escherichia fergusonii* ATCC 35469, *E. coli* O157:H7 str. Sakai, *E. coli* str. K-12 substr. MG1655, *E. coli* UMN026, *E. coli* O104:H4 str. 2011C-3493, and *E. coli* IAI39). The strains in bold and red are those identified in the present study. The bootstrap values greater than 80 are indicated with a black circle on the leaf. The strain *E. fergusonii* ATCC 35469 was the root of the tree. The inner ring represents the CH type, and the outer ring is the isolation source.

Table S1—Antimicrobial susceptibility of strains by disc-diffusion.

| Strains   | Antibiotics (mm) |     |     |     |     |     |     |     |     |     |     |     |
|-----------|------------------|-----|-----|-----|-----|-----|-----|-----|-----|-----|-----|-----|
|           | AMK              | GEN | IPM | MEM | ETP | TGC | CIP | FOX | ATM | CAZ | CTX | FEP |
| SMG001F1  | 16               | 17  | 27  | 30  | 30  | 22  | 21  | 19  | 25  | 24  | 23  | 26  |
| SMG001F2  | 19               | 20  | 28  | 32  | 32  | 22  | 33  | 25  | 28  | 27  | 26  | 30  |
| SMG001F6  | 17               | 18  | 28  | 29  | 30  | 20  | 27  | 25  | 26  | 25  | 25  | 28  |
| SMG002F4  | 17               | 19  | 30  | 30  | 33  | 20  | 30  | 23  | 27  | 27  | 26  | 28  |
| SMG002F5  | 20               | 22  | 32  | 34  | 30  | 23  | 16  | 25  | 12  | 34  | >   | 36  |
| SMG002F6  | 16               | 19  | 29  | 32  | 32  | 21  | 28  | 26  | 33  | 31  | 30  | 35  |
| SMG002F8  | 20               | 21  | 30  | 32  | 34  | 23  | 32  | 26  | 29  | 27  | 29  | 33  |
| SMG002F9  | 20               | 20  | 30  | 34  | 34  | 23  | 32  | 27  | 30  | 30  | 28  | 34  |
| SMG003F2  | 17               | 19  | 29  | 29  | 31  | 21  | 20  | 22  | 24  | 22  | 22  | 28  |
| SMG003F3  | 16               | 18  | 28  | 30  | 31  | 21  | 21  | 20  | 24  | 22  | 22  | 28  |
| SMG003F7  | 20               | 20  | 30  | 30  | 32  | 22  | 23  | 24  | 27  | 24  | 26  | 27  |
| SMG003F10 | 26               | 26  | >   | >   | 40  | 26  | 38  | 28  | >   | 32  | >   | >   |
| SMG004F1  | 20               | 23  | 31  | 33  | 34  | 23  | 23  | 24  | 28  | 24  | 26  | 31  |
| SMG004F8  | 20               | 21  | 30  | 31  | 33  | 23  | 24  | 24  | 28  | 26  | 27  | 30  |
| SMG005F2  | 18               | 19  | 28  | 30  | 33  | 23  | 9   | 26  | 26  | 26  | 26  | 25  |
| SMG005F3  | 18               | 20  | 27  | 30  | 32  | 23  | 9   | 27  | 26  | 25  | 24  | 29  |
| SMG006F1  | 20               | 20  | 32  | 32  | 34  | 23  | 33  | 25  | 34  | 31  | 30  | 34  |
| SMG006F11 | 15               | 10  | 30  | 32  | 32  | 23  | 10  | 26  | 9   | 29  | 32  | 32  |
| SMG007F1  | 21               | 23  | 30  | 36  | 36  | 22  | 32  | 25  | 30  | 30  | >   | 30  |
| SMG007F7  | 20               | 20  | 30  | 32  | 31  | 23  | 29  | 26  | 30  | 30  | 29  | 32  |
| SMG007U   | 20               | 20  | 30  | 31  | 31  | 21  | 31  | 25  | >   | 28  | >   | 30  |
| SMG008F1  | 18               | 20  | 29  | 31  | 31  | 19  | 26  | 21  | 24  | 25  | 25  | 28  |
| SMG008F2  | 14               | 21  | 33  | 34  | 30  | 18  | 6   | 15  | 14  | 18  | 8   | 15  |
| SMG008F9  | 13               | 19  | 32  | 33  | 30  | 18  | 6   | 14  | 16  | 10  | 18  | 18  |
| SMG008F10 | 18               | 20  | 30  | 32  | 31  | 18  | 28  | 21  | 28  | 25  | 26  | 27  |
| SMG008F11 | 19               | 19  | 26  | 29  | 30  | 22  | 30  | 23  | 27  | 26  | 24  | 28  |
| SMG008U   | 17               | 19  | 26  | 29  | 28  | 16  | 6   | 22  | 17  | 15  | 12  | 17  |
| SMG009F1  | 20               | 20  | 30  | 32  | 34  | 23  | 32  | 25  | 32  | 28  | 30  | 34  |
| SMG009F5  | 19               | 20  | 29  | 32  | 33  | 22  | 29  | 20  | 30  | 30  | 27  | 30  |
| SMG009U   | 19               | 20  | 29  | 32  | 32  | 20  | 27  | 25  | 31  | 27  | 32  | 31  |
| SMG010F1  | 17               | 19  | 25  | 31  | 31  | 22  | 6   | 10  | 22  | 12  | 24  | 25  |
| SMG010U   | 19               | 20  | 24  | 30  | 30  | 19  | 6   | 11  | 22  | 14  | 21  | 30  |
| SMG011F7  | 18               | 19  | 30  | 32  | 33  | 21  | 28  | 22  | 30  | 23  | 25  | 32  |
| SMG011U   | 24               | 26  | 33  | >   | 37  | 23  | 34  | 24  | >   | 30  | >   | 36  |
| SMG012F1  | 19               | 19  | 30  | 30  | 32  | 24  | 13  | 25  | 30  | 29  | 30  | 32  |
| SMG012F3  | 17               | 19  | 28  | 29  | 31  | 21  | 26  | 19  | 25  | 24  | 24  | 26  |
| SMG012F6  | 18               | 20  | 27  | 26  | 32  | 22  | 23  | 22  | 30  | 27  | 28  | 30  |
| SMG012U   | 25               | 27  | 35  | >   | 41  | 22  | 32  | 26  | >   | 33  | >   | 39  |
| SMG013F1  | 16               | 18  | 28  | 28  | 33  | 21  | 6   | 19  | 29  | 27  | 26  | 31  |
| SMG013U   | 20               | 21  | 28  | 33  | 34  | 20  | 22  | 25  | 29  | 27  | 31  | 31  |

Table S1 continued—Antimicrobial susceptibility of strains by disc-diffusion.

| Strains   | Antibiotics (mm) |           |     |     |     |     |          |           |           |           |           |           |
|-----------|------------------|-----------|-----|-----|-----|-----|----------|-----------|-----------|-----------|-----------|-----------|
|           | AMK              | GEN       | IPM | MEM | ETP | TGC | CIP      | FOX       | ATM       | CAZ       | CTX       | FEP       |
| SMG014F10 | <b>10</b>        | <b>9</b>  | 31  | 33  | 32  | 22  | <b>6</b> | 21        | <b>16</b> | <b>18</b> | <b>10</b> | <b>17</b> |
| SMG014F11 | <b>10</b>        | <b>8</b>  | 32  | 32  | 34  | 22  | <b>6</b> | <b>18</b> | 26        | 28        | 29        | 32        |
| SMG014F12 | <b>8</b>         | <b>6</b>  | 32  | 34  | 30  | 22  | <b>6</b> | 21        | <b>8</b>  | <b>6</b>  | <b>16</b> | <b>14</b> |
| SMG014U   | 19               | <b>12</b> | 31  | 30  | 30  | 23  | <b>6</b> | 22        | <b>13</b> | <b>14</b> | <b>10</b> | <b>15</b> |
| SMG015U   | 21               | 19        | 29  | 32  | 32  | 19  | 31       | 26        | 32        | 27        | 31        | 32        |
| SMG016F1  | 19               | 20        | 31  | 32  | 34  | 25  | 32       | 22        | 32        | 30        | 32        | 34        |
| SMG016F4a | 20               | 22        | 28  | 30  | 33  | 25  | 30       | 24        | 27        | 26        | 33        | 29        |
| SMG016F10 | 18               | 18        | 29  | 36  | 31  | 23  | 30       | 23        | 26        | 27        | 27        | 30        |
| SMG016U   | 23               | 25        | 31  | 35  | 36  | 25  | 34       | 28        | >         | >         | >         | 35        |
| SMG017F1  | <b>17</b>        | 19        | 29  | 31  | 30  | 21  | 27       | 23        | 27        | 25        | 24        | 26        |
| SMG017F2  | <b>17</b>        | 18        | 27  | 30  | 31  | 20  | 28       | 25        | 26        | 25        | 24        | 26        |
| SMG017F3  | <b>17</b>        | 19        | 26  | 29  | 31  | 20  | 30       | 24        | 25        | 23        | 23        | 25        |
| SMG017F8  | 18               | 19        | 28  | 32  | 33  | 21  | 26       | 21        | 28        | 27        | 27        | 31        |
| SMG017U   | 20               | 21        | 30  | 33  | 33  | 21  | 30       | 25        | >         | 27        | 33        | 31        |
| SMG018F1  | 19               | 21        | 30  | 32  | 33  | 18  | 31       | 19        | 28        | 25        | 27        | 30        |
| SMG018U   | 20               | 17        | 34  | 34  | 33  | 22  | 28       | 23        | 31        | 26        | 34        | 31        |

Values of the diameters in millimeters. AMK: amikacin; GEN: gentamicin; IPM: imipenem; MER: meropenem; ETP: ertapenem; TGC: tigecycline; CIP: ciprofloxacin; FOX: ceftazidime; ATM: aztreonam; CAZ: ceftazidime; CTX: cefotaxime; FEP: cefepime. The antimicrobial susceptibility was determined according to EUCAST and represented by the text colors; blue values mean susceptible, standard dosing regimen; orange values mean susceptible, increased exposure; bold red values mean resistance. The symbol > represents a diameter of more than 40 mm.

**Table S2—Antimicrobial resistance genes, point mutations, and ST of the 49 *Escherichia coli* strains sequenced.**

| Strains   | ST (cc)    | AMR genes detected <sup>a</sup>                                                                                                                                                                                                                                                                        | punctual mutations                       |
|-----------|------------|--------------------------------------------------------------------------------------------------------------------------------------------------------------------------------------------------------------------------------------------------------------------------------------------------------|------------------------------------------|
| SMG001F1  | 38         | <i>aph(3'')-Ib</i> , <i>aph(6')-Id</i> , <i>bla</i> <sub>TEM-30</sub> , <i>catA1</i> , <i>dfrA7</i> , <i>sul2</i> , <i>tetD</i>                                                                                                                                                                        | <i>gyrA</i> p.S83L                       |
| SMG001F6  | 38         | <i>aph(3'')-Ib</i> , <i>aph(6')-Id</i> , <i>bla</i> <sub>TEM-30</sub> , <i>catA1</i> , <i>dfrA7</i> , <i>sul2</i> , <i>tetD</i>                                                                                                                                                                        | <i>gyrA</i> p.S83L                       |
| SMG001F2  | 6458 (10)  | <i>aadA2</i> , <i>aph(3'')-Ib</i> , <i>aph(6')-Id</i> , <i>bla</i> <sub>TEM-1C</sub> , <i>dfrA12</i> , <i>sul1</i> , <i>tet(A)</i>                                                                                                                                                                     | -                                        |
| SMG002F4  | 10         | -                                                                                                                                                                                                                                                                                                      | -                                        |
| SMG002F6  | 10         | -                                                                                                                                                                                                                                                                                                      | -                                        |
| SMG002F9  | 10         | -                                                                                                                                                                                                                                                                                                      | -                                        |
| SMG002F5  | 88         | <i>aadA1</i> , <i>dfrA1</i> , <i>sul2</i> , <i>tet(B)</i>                                                                                                                                                                                                                                              | -                                        |
| SMG002F8  | 1727 (446) | -                                                                                                                                                                                                                                                                                                      | -                                        |
| SMG003F2  | 69         | <i>aph(3'')-Ib</i> , <i>aph(6')-Id</i> , <i>sul2</i>                                                                                                                                                                                                                                                   | <i>gyrA</i> p.S83L                       |
| SMG003F3  | 69         | <i>aph(3'')-Ib</i> , <i>aph(6')-Id</i> , <i>sul2</i>                                                                                                                                                                                                                                                   | <i>gyrA</i> p.S83L                       |
| SMG003F7  | 13         | <i>aadA1</i> , <i>dfrA1</i> , <i>floR</i> , <i>sul2</i>                                                                                                                                                                                                                                                | -                                        |
| SMG003F10 | 13         | <i>aadA1</i> , <i>dfrA1</i> , <i>floR</i> , <i>sul2</i>                                                                                                                                                                                                                                                | -                                        |
| SMG004F1  | 69         | <i>bla</i> <sub>TEM-1B</sub>                                                                                                                                                                                                                                                                           | <i>gyrA</i> p.S83L                       |
| SMG004F8  | 69         | <i>bla</i> <sub>TEM-1B</sub>                                                                                                                                                                                                                                                                           | <i>gyrA</i> p.S83L                       |
| SMG005F2  | 1193 (14)  | -                                                                                                                                                                                                                                                                                                      | <i>gyrA</i> p.S83L<br><i>gyrA</i> p.D87N |
| SMG005F3  | 1193 (14)  | -                                                                                                                                                                                                                                                                                                      | <i>gyrA</i> p.S83L<br><i>gyrA</i> p.D87N |
| SMG006F1  | 10         | -                                                                                                                                                                                                                                                                                                      | -                                        |
| SMG006F11 | 1193 (14)  | <i>aac(3)-IId</i> , <i>bla</i> <sub>TEM-1B</sub>                                                                                                                                                                                                                                                       | <i>gyrA</i> p.S83L<br><i>gyrA</i> p.D87N |
| SMG007F1  | 14         | -                                                                                                                                                                                                                                                                                                      | -                                        |
| SMG007F7  | 14         | -                                                                                                                                                                                                                                                                                                      | -                                        |
| SMG007U   | 14         | -                                                                                                                                                                                                                                                                                                      | -                                        |
| SMG008F1  | 101        | -                                                                                                                                                                                                                                                                                                      | -                                        |
| SMG008F10 | 101        | -                                                                                                                                                                                                                                                                                                      | -                                        |
| SMG008F2  | 10         | <i>aac(6')-Ib-cr</i> , <i>aadA1</i> , <i>aph(3')-Ia</i> , <i>aph(3'')-Ib</i> , <i>aph(6')-Id</i> , <i>bla</i> <sub>OXA-1</sub> , <i>bla</i> <sub>CTX-M-15</sub> , <i>bla</i> <sub>TEM-1B</sub> , <i>catB3</i> , <i>cml</i> , <i>dfrA14</i> , <i>floR</i> , <i>sul3</i> , <i>tet(B)</i>                 | <i>gyrA</i> p.S83L<br><i>gyrA</i> p.D87N |
| SMG008F9  | 10         | <i>aac(6')-Ib-cr</i> , <i>aadA1</i> , <i>aph(3')-Ia</i> , <i>aph(3'')-Ib</i> , <i>aph(6')-Id</i> , <i>bla</i> <sub>OXA-1</sub> , <i>bla</i> <sub>CTX-M-15</sub> , <i>bla</i> <sub>TEM-1B</sub> , <i>catB3</i> , <i>cml</i> , <i>dfrA14</i> , <i>floR</i> , <i>sul3</i> , <i>tet(A)</i> , <i>tet(B)</i> | <i>gyrA</i> p.S83L<br><i>gyrA</i> p.D87N |
| SMG008U   | 10         | <i>aac(6')-Ib-cr</i> , <i>aadA1</i> , <i>aph(3')-Ia</i> , <i>aph(3'')-Ib</i> , <i>aph(6')-Id</i> , <i>bla</i> <sub>OXA-1</sub> , <i>bla</i> <sub>CTX-M-15</sub> , <i>bla</i> <sub>TEM-1B</sub> , <i>catB3</i> , <i>cml</i> , <i>dfrA14</i> , <i>floR</i> , <i>sul3</i> , <i>tet(A)</i> , <i>tet(B)</i> | <i>gyrA</i> p.S83L<br><i>gyrA</i> p.D87N |
| SMG008F11 | 69         | <i>aadA5</i> , <i>aph(3'')-Ib</i> , <i>aph(6')-Id</i> , <i>bla</i> <sub>TEM-1B</sub> , <i>dfrA17</i> , <i>sul2</i>                                                                                                                                                                                     | -                                        |
| SMG009F1  | 73         | -                                                                                                                                                                                                                                                                                                      | -                                        |
| SMG009F5  | 219        | -                                                                                                                                                                                                                                                                                                      | -                                        |
| SMG010F1  | 224        | <i>bla</i> <sub>TEM-1B</sub> , <i>bla</i> <sub>DHA-1</sub> , <i>qnrB4</i> , <i>su11</i> , <i>tet(B)</i> ,                                                                                                                                                                                              | <i>gyrA</i> p.S83L<br><i>gyrA</i> p.D87N |
| SMG011F7  | 5493 (20)  | -                                                                                                                                                                                                                                                                                                      | -                                        |



**Table S2 Continued – Antimicrobial resistance genes, point mutations, and ST of the 49 *Escherichia coli* strains sequenced.**

|           |           |                                                                                                                                                                                                      |                                          |
|-----------|-----------|------------------------------------------------------------------------------------------------------------------------------------------------------------------------------------------------------|------------------------------------------|
| SMG012F1  | 101       | <i>aac(3)-IIId, aph(3'')-Ia, aph(3'')-Ib, aph(6')-Id, aadA1, aadA2, bla<sub>TEM-1B</sub>, dfrA12, floR, sul2, tet(B)</i>                                                                             | <i>gyrA</i> p.S83L<br><i>gyrA</i> p.D87N |
| SMG012F3  | 361       | -                                                                                                                                                                                                    | -                                        |
| SMG012F6  | 69        | <i>mcr-1.26, qnrB19</i>                                                                                                                                                                              | -                                        |
| SMG013F1  | 131       | -                                                                                                                                                                                                    | <i>gyrA</i> p.S83L<br><i>gyrA</i> p.D87N |
| SMG013U   | 998       | <i>qnrB19</i>                                                                                                                                                                                        | -                                        |
| SMG014F10 | 131       | <i>aac(3)-IIa, aac(6')-Ib-cr, aph(3'')-Ib, aph(6')-Id, bla<sub>OXA-1</sub>, bla<sub>CTX-M-15</sub>, bla<sub>TEM-1B</sub>, catA1, catB3, sul2, tet(B)</i>                                             | <i>gyrA</i> p.S83L<br><i>gyrA</i> p.D87N |
| SMG014F12 | 131       | <i>aac(3)-IIa, aac(6')-Ib-cr, aph(3'')-Ib, aph(6')-Id, bla<sub>OXA-1</sub>, bla<sub>CTX-M-15</sub>, bla<sub>TEM-1B</sub>, catA1, catB3, <b>dfrA14</b>, <b>qnrB1</b>, sul2, <b>tet(A)</b>, tet(B)</i> | <i>gyrA</i> p.S83L<br><i>gyrA</i> p.D87N |
| SMG014F11 | 1193 (14) | <i>aac(3)-IIId, aadA5, bla<sub>TEM-1B</sub>, dfrA17, sul1</i>                                                                                                                                        | <i>gyrA</i> p.S83L<br><i>gyrA</i> p.D87N |
| SMG015U   | 1236      | -                                                                                                                                                                                                    | -                                        |
| SMG016F1  | 69        | <i>aph(3'')-Ib, aph(6')-Id, sul2</i>                                                                                                                                                                 | -                                        |
| SMG016F4a | 69        | -                                                                                                                                                                                                    | -                                        |
| SMG016F10 | 69        | -                                                                                                                                                                                                    | -                                        |
| SMG017F1  | 69        | <i>tet(B)</i>                                                                                                                                                                                        | -                                        |
| SMG017F2  | 93        | -                                                                                                                                                                                                    | -                                        |
| SMG017F3  | 59        | -                                                                                                                                                                                                    | -                                        |
| SMG017F8  | 4238 (10) | -                                                                                                                                                                                                    | -                                        |
| SMG017U   | 127       | <i>aph(3'')-Ib, aph(6')-Id, bla<sub>TEM-1B</sub>, sul2</i>                                                                                                                                           | -                                        |
| SMG018F1  | 131       | <i>aph(3'')-Ib, aph(6')-Id, bla<sub>TEM-1B</sub>, dfrA8, sul2, tet(A)</i>                                                                                                                            | -                                        |

<sup>a</sup> AMR genes described are those found using ResFinder in each strain. <sup>b</sup> In bold are the genes that were not found in the genome of the putative variants sequenced.
